# Supplementary material for: Development and Validation of a Questionnaire to Assess Social Participation of High Risk-Adults in Germany During the COVID-19 Pandemic
Source: PubMed Central journal article supplement (PMC9086897; doi:10.3389/fpubh.2022.831087), 2022-04-26
Supplement: Table_1.pdf [file Table_1.pdf]

## Supplementary Material

Was trifft auf Ihre momentane Lebenssituation zu?

|                                                                                                                                                                                                           | stimme voll zu           | stimme eher zu           | teils-teils              | stimme nicht zu          | stimme eher nicht zu     | trifft auf mich nicht zu |
|-----------------------------------------------------------------------------------------------------------------------------------------------------------------------------------------------------------|--------------------------|--------------------------|--------------------------|--------------------------|--------------------------|--------------------------|
| 1.1 <b>FA1:</b> Ich habe ausreichend Möglichkeiten, Aktivitäten außer Haus für meine körperliche und seelische Gesundheit (Sport, Spazieren gehen etc.) wahrzunehmen.                                     | <input type="checkbox"/> | <input type="checkbox"/> | <input type="checkbox"/> | <input type="checkbox"/> | <input type="checkbox"/> | <input type="checkbox"/> |
| 1.2 <b>FA1:</b> Ich fühle mich momentan häufig alleine.*                                                                                                                                                  | <input type="checkbox"/> | <input type="checkbox"/> | <input type="checkbox"/> | <input type="checkbox"/> | <input type="checkbox"/> | <input type="checkbox"/> |
| 1.3 <b>FA1:</b> Ich habe momentan guten Kontakt zu all den Menschen, die mir wichtig sind.                                                                                                                | <input type="checkbox"/> | <input type="checkbox"/> | <input type="checkbox"/> | <input type="checkbox"/> | <input type="checkbox"/> | <input type="checkbox"/> |
| 1.4 <b>FA1:</b> Ich habe momentan ausreichend Betätigungen und Hobbies, die mir Spaß machen.                                                                                                              | <input type="checkbox"/> | <input type="checkbox"/> | <input type="checkbox"/> | <input type="checkbox"/> | <input type="checkbox"/> | <input type="checkbox"/> |
| 1.5 <b>FA1:</b> Momentan habe ich das Gefühl, das Leben läuft ohne mich weiter.*                                                                                                                          | <input type="checkbox"/> | <input type="checkbox"/> | <input type="checkbox"/> | <input type="checkbox"/> | <input type="checkbox"/> | <input type="checkbox"/> |
| 1.6 <b>FA1:</b> Ich kann meinen Alltag weitgehend frei gestalten.                                                                                                                                         | <input type="checkbox"/> | <input type="checkbox"/> | <input type="checkbox"/> | <input type="checkbox"/> | <input type="checkbox"/> | <input type="checkbox"/> |
| 1.7 <b>FA2:</b> Ich umarme Freunde und Verwandte zur Begrüßung, wenn sie mir wichtig sind und nahe stehen.                                                                                                | <input type="checkbox"/> | <input type="checkbox"/> | <input type="checkbox"/> | <input type="checkbox"/> | <input type="checkbox"/> | <input type="checkbox"/> |
| 1.8 <b>FA2:</b> Ich bin momentan aktiv in Vereinen, Kirchen, Selbsthilfegruppen oder der Nachbarschaft.                                                                                                   | <input type="checkbox"/> | <input type="checkbox"/> | <input type="checkbox"/> | <input type="checkbox"/> | <input type="checkbox"/> | <input type="checkbox"/> |
| 1.9 <b>FA2:</b> Ich habe schon für die nächsten Monate konkrete Zusammenkünfte, Urlaub oder Reisen geplant (bspw. ein Hotelzimmer/ Campingplatz reserviert oder einen Flug gebucht).                      | <input type="checkbox"/> | <input type="checkbox"/> | <input type="checkbox"/> | <input type="checkbox"/> | <input type="checkbox"/> | <input type="checkbox"/> |
| 1.10 <b>FA2:</b> Ich entscheide mich spontan und ohne Planungen zu Verabredungen, zum Bummeln oder zu Ausflügen.                                                                                          | <input type="checkbox"/> | <input type="checkbox"/> | <input type="checkbox"/> | <input type="checkbox"/> | <input type="checkbox"/> | <input type="checkbox"/> |
| 1.11 <b>FA3:</b> Ich schränke momentan mein Leben mehr ein als meine Freunde und Kollegen.*                                                                                                               | <input type="checkbox"/> | <input type="checkbox"/> | <input type="checkbox"/> | <input type="checkbox"/> | <input type="checkbox"/> | <input type="checkbox"/> |
| 1.12 <b>FA3:</b> Meine getroffenen Vorkehrungen, um mich vor einer Ansteckung mit COVID-19 zu schützen, sind strenger als die behördlichen Vorgaben (z.B. Anzahl der Menschen, die sich treffen dürfen).* | <input type="checkbox"/> | <input type="checkbox"/> | <input type="checkbox"/> | <input type="checkbox"/> | <input type="checkbox"/> | <input type="checkbox"/> |
| 1.13 <b>FA3:</b> Persönliche Treffen mit für mich wichtigen Menschen außerhalb meines Haushalts vermeide ich.*                                                                                            | <input type="checkbox"/> | <input type="checkbox"/> | <input type="checkbox"/> | <input type="checkbox"/> | <input type="checkbox"/> | <input type="checkbox"/> |
| 1.14 <b>FA3:</b> Ich verschiebe momentan Arzttermine, Krankenhausbehandlungen oder (Vorsorge-) Untersuchungen um mich nicht einer Infektionsgefahr auszusetzen.*                                          | <input type="checkbox"/> | <input type="checkbox"/> | <input type="checkbox"/> | <input type="checkbox"/> | <input type="checkbox"/> | <input type="checkbox"/> |

**Supplementary Table 1.** PSP-Q German; \* indicates reversed pooled items; FA1: well-being participation; FA2: active social participation; FA3: restrictions

What applies to your **current** life situation?

|                                                                                                                                                                                 | neither agree or disagree | rather agree             | rather disagree          | disagree                 | does not apply to me     |
|---------------------------------------------------------------------------------------------------------------------------------------------------------------------------------|---------------------------|--------------------------|--------------------------|--------------------------|--------------------------|
| 1.1 <b>FA2:</b> I have sufficient opportunities to engage in activities outside the home for my physical and mental health (Sports, walking, etc.).                             | <input type="checkbox"/>  | <input type="checkbox"/> | <input type="checkbox"/> | <input type="checkbox"/> | <input type="checkbox"/> |
| 1.2 <b>FA2:</b> I often feel alone at the moment.*                                                                                                                              | <input type="checkbox"/>  | <input type="checkbox"/> | <input type="checkbox"/> | <input type="checkbox"/> | <input type="checkbox"/> |
| 1.3 <b>FA2:</b> I am currently in good contact with all the people who are important to me.                                                                                     | <input type="checkbox"/>  | <input type="checkbox"/> | <input type="checkbox"/> | <input type="checkbox"/> | <input type="checkbox"/> |
| 1.4 <b>FA2:</b> At the moment I have enough activities and hobbies that I enjoy.                                                                                                | <input type="checkbox"/>  | <input type="checkbox"/> | <input type="checkbox"/> | <input type="checkbox"/> | <input type="checkbox"/> |
| 1.5 <b>FA2:</b> At the moment I feel like life goes on without me.*                                                                                                             | <input type="checkbox"/>  | <input type="checkbox"/> | <input type="checkbox"/> | <input type="checkbox"/> | <input type="checkbox"/> |
| 1.6 <b>FA2:</b> I can organise my everyday life freely to a large extent.                                                                                                       | <input type="checkbox"/>  | <input type="checkbox"/> | <input type="checkbox"/> | <input type="checkbox"/> | <input type="checkbox"/> |
| 1.7 <b>FA1:</b> I hug friends and relatives to greet them if they are important and close to me.                                                                                | <input type="checkbox"/>  | <input type="checkbox"/> | <input type="checkbox"/> | <input type="checkbox"/> | <input type="checkbox"/> |
| 1.8 <b>FA1:</b> I am currently active in clubs, churches, self-help groups or the neighbourhood.                                                                                | <input type="checkbox"/>  | <input type="checkbox"/> | <input type="checkbox"/> | <input type="checkbox"/> | <input type="checkbox"/> |
| 1.9 <b>FA1:</b> I have already planned specific meetings, holidays or trips for the next few months (e.g. reserved a hotel room/campsite or booked a flight).                   | <input type="checkbox"/>  | <input type="checkbox"/> | <input type="checkbox"/> | <input type="checkbox"/> | <input type="checkbox"/> |
| 1.10 <b>FA1:</b> I decide spontaneously and without planning to go on dates, strolls or excursions.                                                                             | <input type="checkbox"/>  | <input type="checkbox"/> | <input type="checkbox"/> | <input type="checkbox"/> | <input type="checkbox"/> |
| 1.11 <b>FA3:</b> I am currently limiting my life more than my friends and colleagues.*                                                                                          | <input type="checkbox"/>  | <input type="checkbox"/> | <input type="checkbox"/> | <input type="checkbox"/> | <input type="checkbox"/> |
| 1.12 <b>FA3:</b> The precautions I have taken to protect myself from contracting COVID-19 are stricter than the official requirements (e.g. number of people allowed to meet).* | <input type="checkbox"/>  | <input type="checkbox"/> | <input type="checkbox"/> | <input type="checkbox"/> | <input type="checkbox"/> |
| 1.13 <b>FA3:</b> I avoid personal meetings with people outside my household who are important to me.*                                                                           | <input type="checkbox"/>  | <input type="checkbox"/> | <input type="checkbox"/> | <input type="checkbox"/> | <input type="checkbox"/> |
| 1.14 <b>FA3:</b> I am currently postponing doctor's appointments, hospital treatment or (preventive) examinations in order not to expose myself to the risk of infection.*      | <input type="checkbox"/>  | <input type="checkbox"/> | <input type="checkbox"/> | <input type="checkbox"/> | <input type="checkbox"/> |

**Supplementary Table 1.** PSP-Q German; \* indicates reversed pooled items; FA1: wellbeing participation; FA2: active social participation; FA3: restrictions
